# Supplementary material
Source: Springer Nature journal article supplement (https://www.springermedizin.de/resource/supplementary/13012_2008_210_MOESM3_ESM.pdf/9629478)

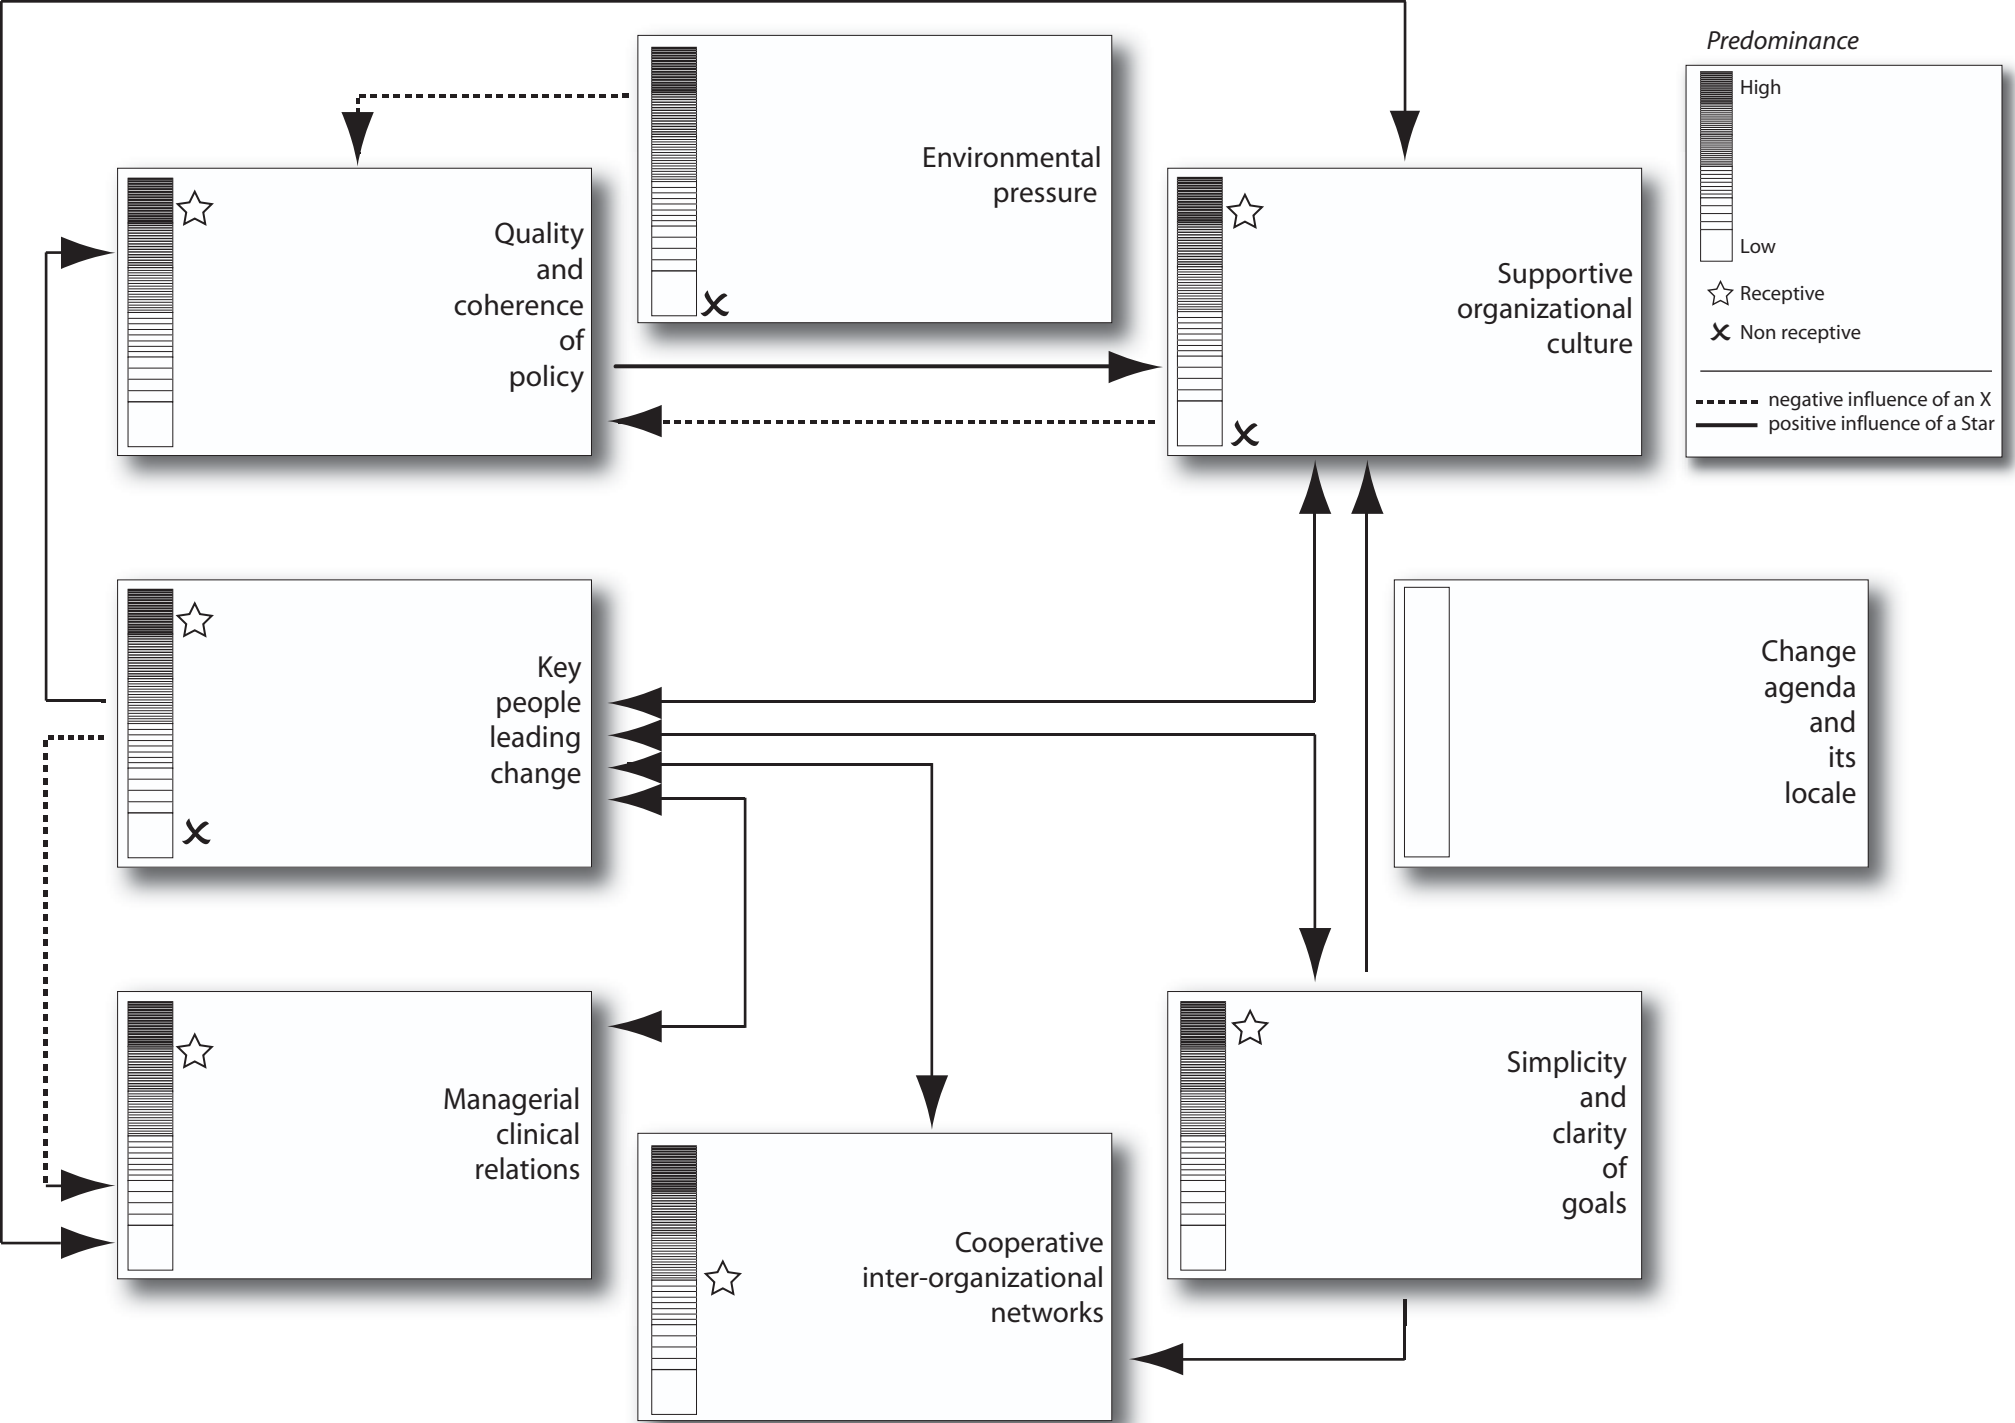

Supplement: MOESM3 [file 9629478]
